# Supplementary material for: Graphitic carbon nitride nanosheet coated carbon black as a high-performance PtRu catalyst support material for methanol electrooxidation
Source: Royal Society of Chemistry journal article supplement (doi:10.1039/c4ta04594g), 2014-01-01
Supplement: c4ta04594g1.pdf [file c4ta04594g1.pdf]

Electronic supplementary information

**Graphitic carbon nitride nanosheets coated carbon black as high-performance PtRu catalyst support material for methanol electrooxidation**

Cun-Zhi Li,<sup>ab</sup> Zhen-Bo Wang,<sup>\*a</sup> Xu-Lei Sui,<sup>a</sup> Li-Mei Zhang,<sup>a</sup> Da-Ming Gu<sup>b</sup> and Shuo Gu<sup>c</sup>

<sup>a</sup> School of Chemical Engineering and Technology, Harbin Institute of Technology, No.92 West-Da Zhi Street, Harbin, 150001 China

<sup>b</sup> School of Science, Harbin Institute of Technology, No.92 West-Da Zhi Street, Harbin, 150001 China

<sup>c</sup> Department of Electrical and Computer Engineering, The George Washington University, Washington, DC, 20052, USA

\* Corresponding author. Tel.: +86-451-86417853; Fax: +86-451-86418616

E-mail address: [wangzhib@hit.edu.cn](mailto:wangzhib@hit.edu.cn)

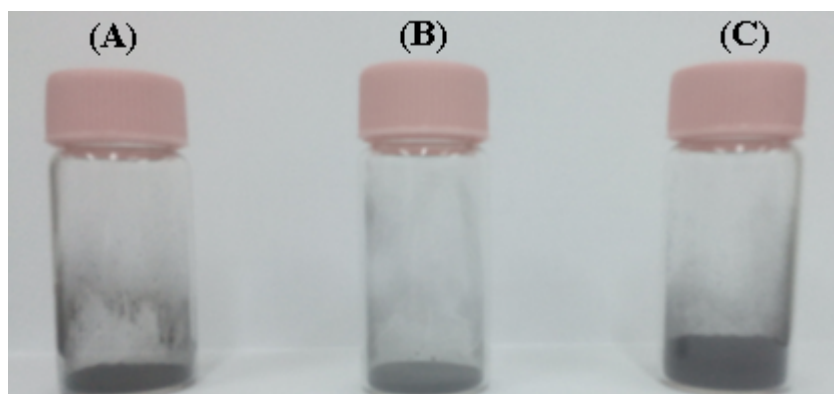

**Fig. S1** A volume comparison of 80 mg powder of Vulcan XC-72R (A), C@bulk g-C<sub>3</sub>N<sub>4</sub> (B) and C@ g-C<sub>3</sub>N<sub>4</sub> NS (C).

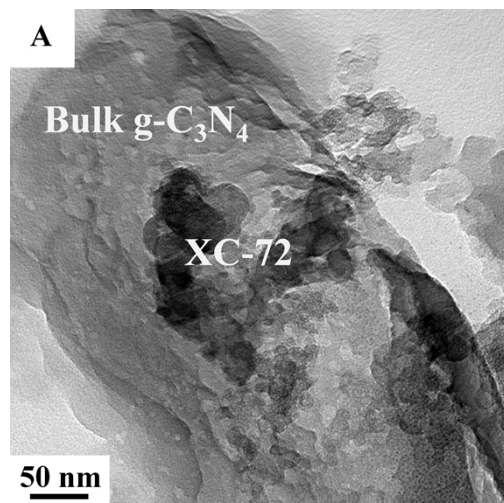

**Fig. S2** TEM images of C@bulk g-C<sub>3</sub>N<sub>4</sub>.

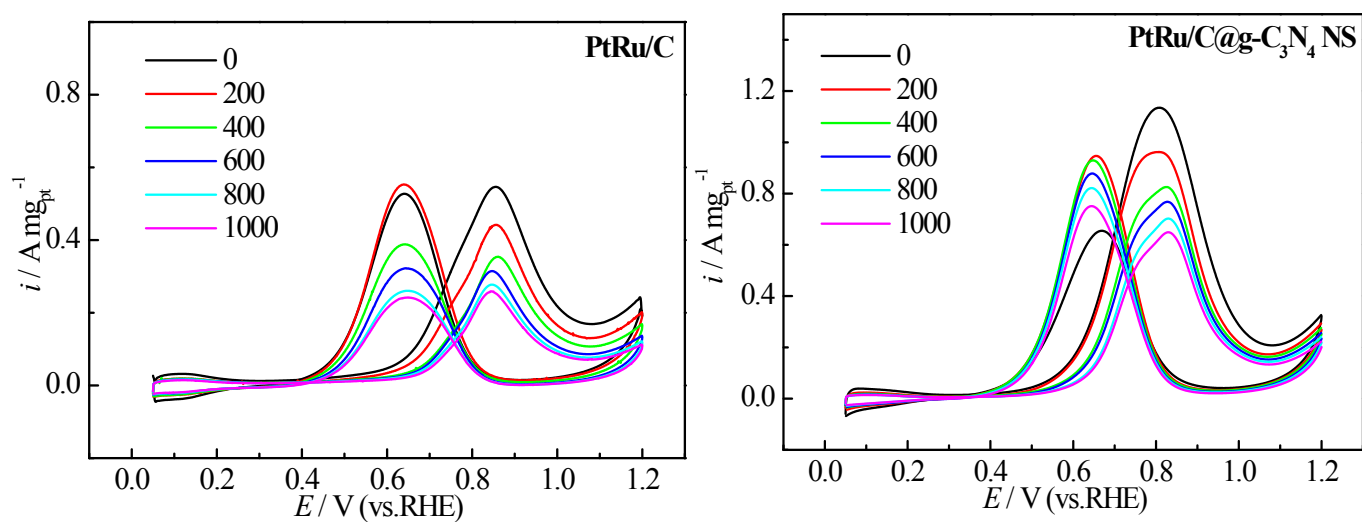

**Fig. S3** Cyclic voltammograms in an Ar-saturated solution of 0.5 mol L<sup>-1</sup> CH<sub>3</sub>OH and 0.5 mol L<sup>-1</sup> H<sub>2</sub>SO<sub>4</sub> at 25°C for PtRu/C and PtRu/C@g-C<sub>3</sub>N<sub>4</sub> NS catalysts during the accelerated potential cycling test. Scanning rate: 50 mV/s; Test temperature: 25°C.

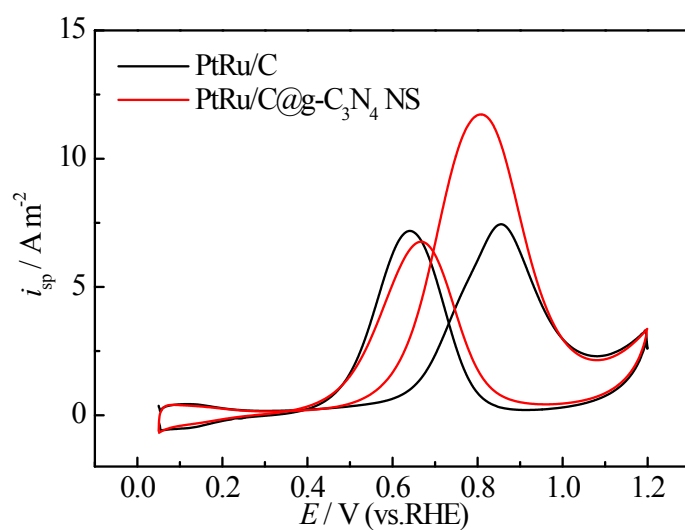

**Fig. S4** The cyclic voltammograms of CH<sub>3</sub>OH electrooxidation with specific activity,  $i_{sp}/\text{A m}^{-2}$  (current density per electrochemical active specific surface area), on as-prepared PtRu/C and PtRu/C@g-C<sub>3</sub>N<sub>4</sub> NS catalyst. Scanning rate: 50  $\text{mV s}^{-1}$

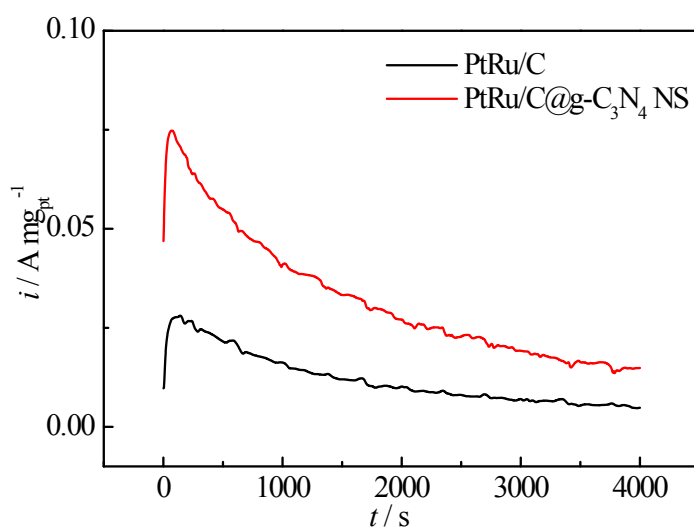

**Fig. S5** Chronoamperometric curves of methanol electrooxidation in a solution of 0.5  $\text{mol L}^{-1}$  CH<sub>3</sub>OH and 0.5  $\text{mol L}^{-1}$  H<sub>2</sub>SO<sub>4</sub> on the PtRu/C and PtRu/C@g-C<sub>3</sub>N<sub>4</sub> NS catalysts. Potential at 0.6 V.
